# Supplementary material
Source: MDPI journal article supplement (https://www.mdpi.com/2226-471X/9/4/146)
Supplement: s1 [file s1]

Archive with 1 entries (1 files):
- languages-2837200-supplementary.pdf
